# Supplementary material for: Large area metal micro-/nano-groove arrays with both structural color and anisotropic wetting fabricated by one-step focused laser interference lithography
Source: Royal Society of Chemistry journal article supplement (doi:10.1039/c8nr09747j), 2019-01-01
Supplement: c8nr09747j1.pdf [file c8nr09747j1.pdf]

## Supplementary Information

### **Large area metal micro/nano-groove arrays with both structural color and anisotropic wetting fabricated by one-step focused laser interference lithography**

Hao Wu,<sup>a</sup> Yunlong Jiao,<sup>a</sup> Chenchu Zhang,<sup>b</sup> Chao Chen,<sup>a</sup> Liang Yang,<sup>a</sup> Jiawen Li,<sup>a,\*</sup>  
Jincheng Ni,<sup>a</sup> Yachao Zhang,<sup>a</sup> Chuanzong Li,<sup>c</sup> Yiyuan Zhang,<sup>a</sup> Shaojun Jiang,<sup>a</sup> Suwan  
Zhu,<sup>a</sup> Yanlei Hu,<sup>a</sup> Dong Wu,<sup>a,\*</sup> and Jiaru Chu<sup>a</sup>

<sup>a</sup> CAS Key Laboratory of Mechanical Behavior and Design of Materials, Department of Precision Machinery and Precision Instrumentation, University of Science and Technology of China, Hefei 230026, China

<sup>b</sup> Institute of Industry and Equipment Technology and <sup>c</sup> School of Instrument Science and Opto-Electronics Engineering, Hefei University of Technology, Hefei 230009, China

\*E-mail: [dongwu@ustc.edu.cn](mailto:dongwu@ustc.edu.cn) and [jwl@ustc.edu.cn](mailto:jwl@ustc.edu.cn)

## Changes in surface chemistry after laser ablation

Figure S1(a) shows X-ray photoelectron spectroscopy (XPS) wide survey spectra of 316L stainless steel surface before and after laser ablation. The detected elements were the main elements of 316L stainless steel as expected. As exhibited in Figure S1(b), O 1s spectra of 316L stainless steel surface before and after laser ablation were deconvoluted into three peaks locating at three binding energy by Gaussian fitting analysis.<sup>26,27</sup> The first peak ( $530.5 \pm 0.5$  eV) should be assigned to  $O^{2-}$  ions in the metal oxide bond. The second one ( $531.2 \pm 0.2$  eV) is derived from surface hydroxyl groups and oxygen vacancies. The third one ( $532.4 \pm 0.1$  eV) is ascribed to the oxygen bonds with carbon (C-O, C=O) and  $H_2O$ . By comparing the ratios of the three peaks to the total intensity before and after laser ablation, it is noteworthy that the ratio of the third peak increased whereas the ratio of the second peak decreased, which indicated that surface hydroxyl groups and oxygen vacancies decreased and oxygen bonds with carbon (C-O, C=O) and  $H_2O$  increased. The decrease of hydroxyl groups led to the increase in hydrophobicity.

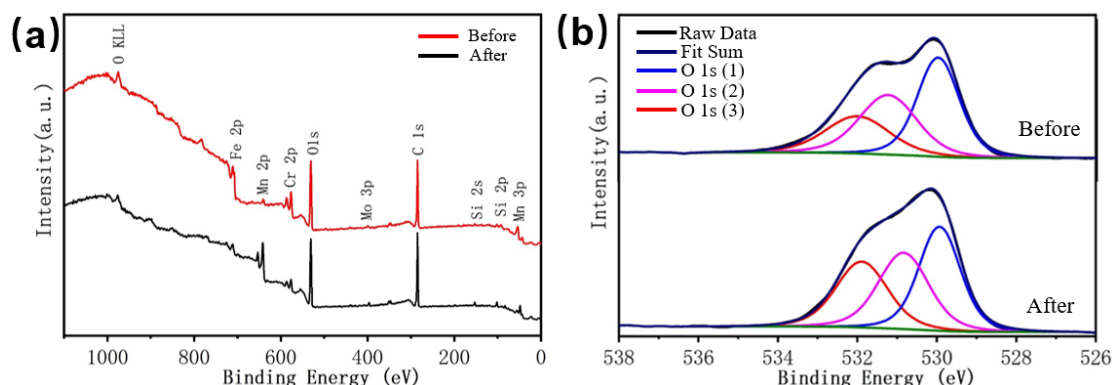

**Figure S1.** (a) XPS wide survey spectra for 316L stainless steel surface before and after laser ablation. (b) Comparison of XPS spectrums for O 1s on 316L stainless steel surface before and after laser ablation.
